# Supplementary material for: Epithelial–Mesenchymal Transition (EMT) Induced by TGF-β in Hepatocellular Carcinoma Cells Reprograms Lipid Metabolism
Source: MDPI journal article supplement (doi:10.3390/ijms22115543), 2021-05-24
Supplement: s1 [file s1]

## Supplementary Materials and Methods

### Immunofluorescence studies

Fluorescence microscopy studies were performed as described previously <sup>1</sup>. Cells were fixed with methanol (100%; -20° C, 2 minutes) prior incubation with blocking solution and the addition of the primary antibodies (1:50). All primary antibodies were diluted in 1% BSA (1 hour; room temperature). After primary antibody incubation, cells were washed three times with PBS, and afterwards samples were incubated with Alexa Fluor 488- or Alexa Fluor 555- conjugated anti-mouse, for 1 hour at room temperature (1:1000) and mounted in Vectashield mounting medium. Cells were visualized in a Nikon eclipse 80i microscope with the appropriate filters. Representative images were taken with a Nikon DS-Ri1 digital camera and edited in Adobe Photoshop. Primary antibodies used: E-Cadherin, #610182 from BD Transduction Laboratories (Erembodegem, Belgium); Vimentin, #V6630 from Sigma-Aldrich (St. Louis, MO, USA); ZO-1, #61-7300 from Invitrogen (Waltham, MA, USA); Cytokeratin 18, #61028 from Progen (Heidelberg, Germany). Phalloidin (#P1951K) and Dapi (4',6-Diamidino-2-Phenylindole, Dihydrochloride, #32670) were from Sigma-Aldrich (St. Louis, MO, USA).

### Analysis of gene expression

Real-time quantitative PCR reactions were performed using the following human specific primers designed by Integrated DNA Technologies (IDT):

|                     |                                                                               |
|---------------------|-------------------------------------------------------------------------------|
| <b><i>L32</i></b>   | Forward: 5'-AACGTCAAGGAGCTGGAAG-3'<br>Reverse: 5'-GGGTGCTGACTCTGATGG-3'       |
| <b><i>CDH1</i></b>  | Forward: 5'-CCCAATACATCTCCCTTCACAG-3'<br>Reverse 5'-CCACCTCTAAGGCCATCTTTG-3'  |
| <b><i>KRT18</i></b> | Forward: 5'-CAGAGACTGGAGCCATTACTTC-3'<br>Reverse: 5'-GCCAGCTCTGTCTCATACTTG-3' |
| <b><i>VIM</i></b>   | Forward: 5'-GGAAGCCTAACTACAGCGAG-3'                                           |

|                      |                                          |
|----------------------|------------------------------------------|
|                      | Reverse: 5' - CAGAGTCCCAGATGAGCATTG -3'  |
| <b><i>SNAI1</i></b>  | Forward: 5'-GCTGCAGGACTCTAATCCAGAGTT-3'  |
|                      | Reverse: 5' -GACAGAGTCCCAGATGAGCATTG-3'  |
| <b><i>SNAI2</i></b>  | Forward: 5'- ACACATTAGAACTCACACGGG -3'   |
|                      | Reverse: 5' - TGGAGAAGGTTTTTGGAGCAG -3'  |
| <b><i>ZEB2</i></b>   | Forward: 5'-AGGCATATGGTGACGCACAA-3'      |
|                      | Reverse: 5' -CTTGAAGTTGCGGTTACCTGC-3'    |
| <b><i>TWIST1</i></b> | Forward: 5'-CTCAGCTACGCCTTCTCG-3'        |
|                      | Reverse: 5' -ACTGTCCATTTTCTCCTTCTCTG-3'  |
| <b><i>ACACA</i></b>  | Forward: 5' - CTGGAGGTGTATGTTCTGAAGG -3' |
|                      | Reverse: 5' - TCTGTTTAGCGTAGGGATGTTC -3' |
| <b><i>ACACB</i></b>  | Forward: 5' - CCCCAGACAAGTATCCCCAAAG -3' |
|                      | Reverse: 5' - GGGTACTCCTGGGTCTTAAAC-3'   |

### **Targeted know-down assays**

Hep3B and SNU449 cell line was transfected with a combination of 4 shRNA plasmids for TGFβRI as well as a control unspecific shRNA. After 24 hours, media was changed to complete media, and selection of transfected cells was done with puromycin (for 50 days prior to experiments).

shRNA plasmids were selected from Mission SH (Sigma-Aldrich, St Louis, USA) with following sequences:

#### **shTβRI:**

- #1 –CCGGCTCATGTTGATGGTCTATATCCTCGAGGATATAGACCATCAACATGAGTTTTTTG-
- #2 –CCGGGAAGTTGCTGTAAAGATATTCTCGAGGAATATCTTAACAGCAACTTCTTTTTTG-
- #3 –CCGGGATCATGATTACTGTCGATAACTCGAGTTATCGACAGTAATCATGATCTTTTTTG-
- #4 –CCGGGCTGGTCTTAACCTTAGGTAAGTACCTAAAGTTAAGACCAGCTTTTTTG-

## Migration assay

Real-time assay of cell motility was examined through the xCELLigence System (ACEA Biosciences, San Diego, USA) as previously described<sup>1</sup>.  $4 \times 10^4$  cells/well were seeded onto the top chamber of a CIM plate®, which was coated with a collagen IV solution (Sigma-Aldrich) and placed onto the Real-Time Cell Analyzer (RTCA) station (ACEA Biosciences, San Diego, USA). Continuous values were represented as Cell Index (CI), a dimensionless parameter, which reflects a relative change in measured electrical impedance, and quantified as a slope ( $\text{h}^{-1}$ ) of the first 8 hours of cell migration.

## Seahorse analysis

For the XF Cell Mito Stress analysis, ATP synthase inhibitor oligomycin ( $1 \mu\text{M}$ ) was injected to block proton movement and therefore oxidative phosphorylation. Consequently, carbonyl cyanide-4-(trifluoromethoxy) phenylhydrazone (FCCP,  $0.5 \mu\text{M}$ ) re-establishes proton movement by disrupting the mitochondrial membrane potential to stimulate maximal OCR and electron transport. At last, a combination of rotenone ( $1 \mu\text{M}$ ) and antimycin ( $1 \mu\text{M}$ ) was added to block complex I and III respectively and therefore completely block the mitochondrial respiration. The values obtained after injection of rotenone and antimycin were considered as non-mitochondrial respiration. The basal OCR was calculated as the last OCR measurement prior the addition of oligomycin minus the last OCR measurement after the addition of antimycin and rotenone. The ATP-linked OCR was calculated as the last OCR measurement prior oligomycin injection minus the last OCR measurement after the addition of oligomycin. The maximal OCR was calculated as the last OCR measurement after FCCP injection minus the last OCR measurement after the addition of antimycin and rotenone.

For the XF Glycolysis stress kit, glucose ( $10 \text{ mM}$ ) was injected, followed by oligomycin ( $1 \mu\text{M}$ ), which as an ATP inhibitor permits the readout of the maximal ECAR. Finally, 2-DG ( $50 \text{ mM}$ ) was added to completely block glycolysis. The level of glycolysis is calculated as the last ECAR measurement after glucose injection minus the last ECAR measurement after the addition of 2-DG. The glycolytic capacity is calculated as the last ECAR measurement after oligomycin

injection minus the last ECAR measurement after 2-DG injection. The glycolytic reserve is calculated as the glycolytic capacity minus glycolysis.

### **Lactate production assay**

The concentration of L-lactate was determined using an enzymatic reaction based on the oxidation of L-lactate to pyruvate by lactate dehydrogenase (5 mg of the enzyme (Roche, Basel, Switzerland)/ml, 550 U/mg) in the presence of NAD<sup>+</sup> (Sigma Aldrich) as previously described <sup>2</sup>. In this assay, the amount of NADH produced in the reaction is proportional to the amount of L-lactate in the samples. With this enzymatic system, D-lactate is not detected. All experiments were carried out at least 3 times in triplicates. The collected culture medium were diluted 1:20 with reaction mix [0.3 M hydrazine sulfate (Sigma Aldrich) and 0.87 M glycine (Sigma Aldrich)], pH 9.5; 2.5 M NAD<sup>+</sup> (Sigma Aldrich) and 0.19 M EDTA (Sigma Aldrich). Lactate dehydrogenase was added at a final concentration of 6.9 U/ml. The NADH concentration was determined as absorbance at 340 nm on a plate reader after 0 and 20 minutes after the start of the reaction. After the subtraction of absorbance at time 0, the absorbance at 20 minutes was normalization to L-lactate standards [(a serial dilution of sodium L-lactate (Sigma Aldrich))], obtained L-lactate concentrations were normalized to respective cell numbers.

### **Glucose consumption assay**

The concentration of glucose was determined using a glucose oxidase and peroxidase method, PGO Enzymes (Sigma Aldrich) according to manufacturer's instructions. Briefly, to prepare the PGO enzyme reaction solution, 100 ml PGO Enzymes solution (1 PGO capsule in 100 ml of distilled water) was mixed with 1.6 ml of the o-Dianisidine solution [50 mg of o-Dianisidine hydrochloride (Sigma Aldrich) in 20 ml of distilled water]. Medium samples were diluted (1/20 in distilled water) and 15 µl of sample was added to 200 µl of prepared reaction mix. After 30 minutes incubation at 37°C, absorbance was read on a plate reader at 450 nm. Different concentrations of glucose solution (Sigma Aldrich) served as the standards. The glucose

consumption was calculated as the glucose concentration of medium control (no cells) minus the glucose concentration of individual samples. All experiments were carried out at least 3 times in triplicates.

## References

- 1 Bertran, E. *et al.* Overactivation of the TGF- $\beta$  pathway confers a mesenchymal-like phenotype and CXCR4-dependent migratory properties to liver tumor cells. *Hepatology* **58(6)**, 2032-2044 (2013).
- 2 Álvarez, Z., Hyroššová, P., Perales, J. & Alcántara, S. Neuronal Progenitor Maintenance Requires Lactate Metabolism and PEPCK-M-Directed Cataplerosis. *Cereb Cortex* **26(3)**, 1046-1058 (2016).

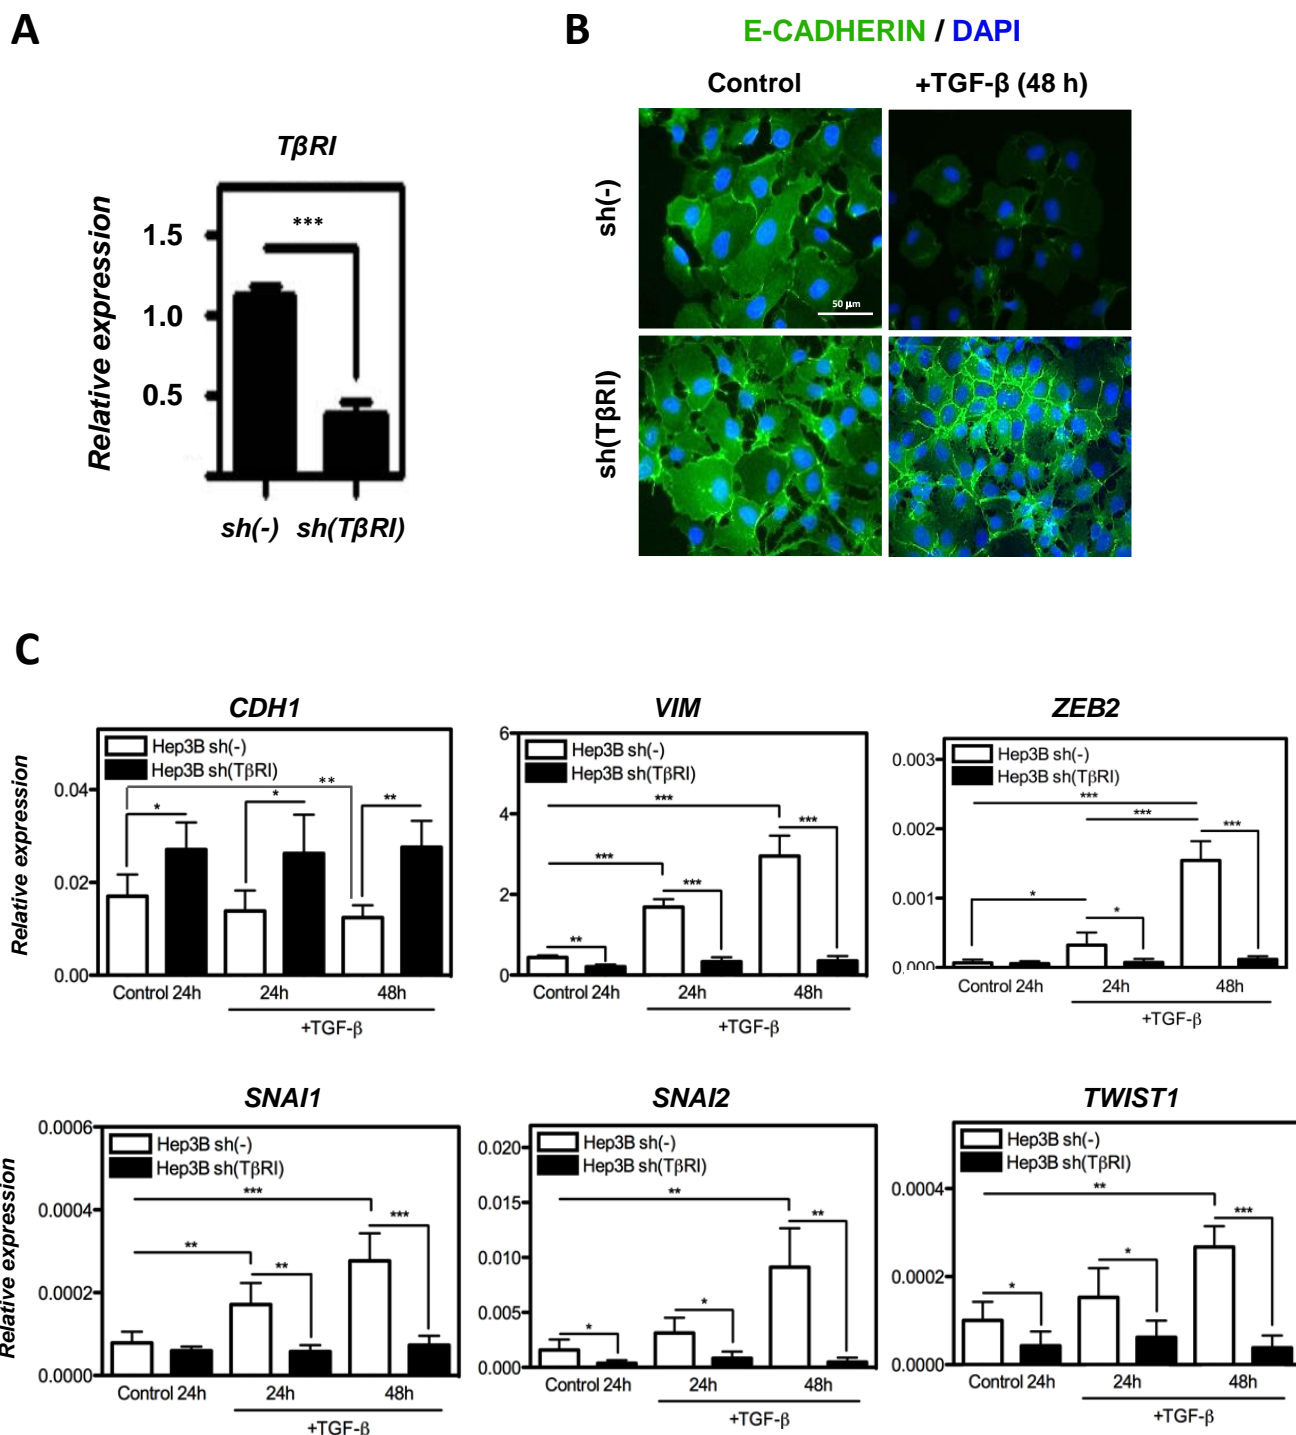

**Figure S1 - Treatment of Hep3B cells with TGF- $\beta$  induces Epithelial-Mesenchymal Transition (EMT), an effect that is abrogated when the TGF- $\beta$  receptor I (*TβRI*) is silenced.**

Hep3B cells, stably transfected with shcontrol (sh-) or specific *TβRI* shRNA (**A.**) were cultured in the absence (Control) or in the presence of TGF- $\beta$  (2 ng/ml) for 24 and/or 48 h, as indicated in each graph: (**B.**): Immunofluorescence analysis of E-cadherin (green), DAPI (nuclei) in blue. Scale bar represents 50  $\mu$ m. (**C.**) mRNA expression levels of EMT-related genes (E-CADHERIN: *CDH1*; VIMENTIN: *VIM*) and EMT-inducing transcription factors (*SNAI1*, *SNAI2*, *TWIST1* and *ZEB2*) were detected by qRT-PCR and normalized to housekeeping gene L32. Mean $\pm$ SD (n=3). \* $p$ <0.05, \*\* $p$ <0.01, \*\*\* $p$ <0.001, compared as indicated in the graphs.

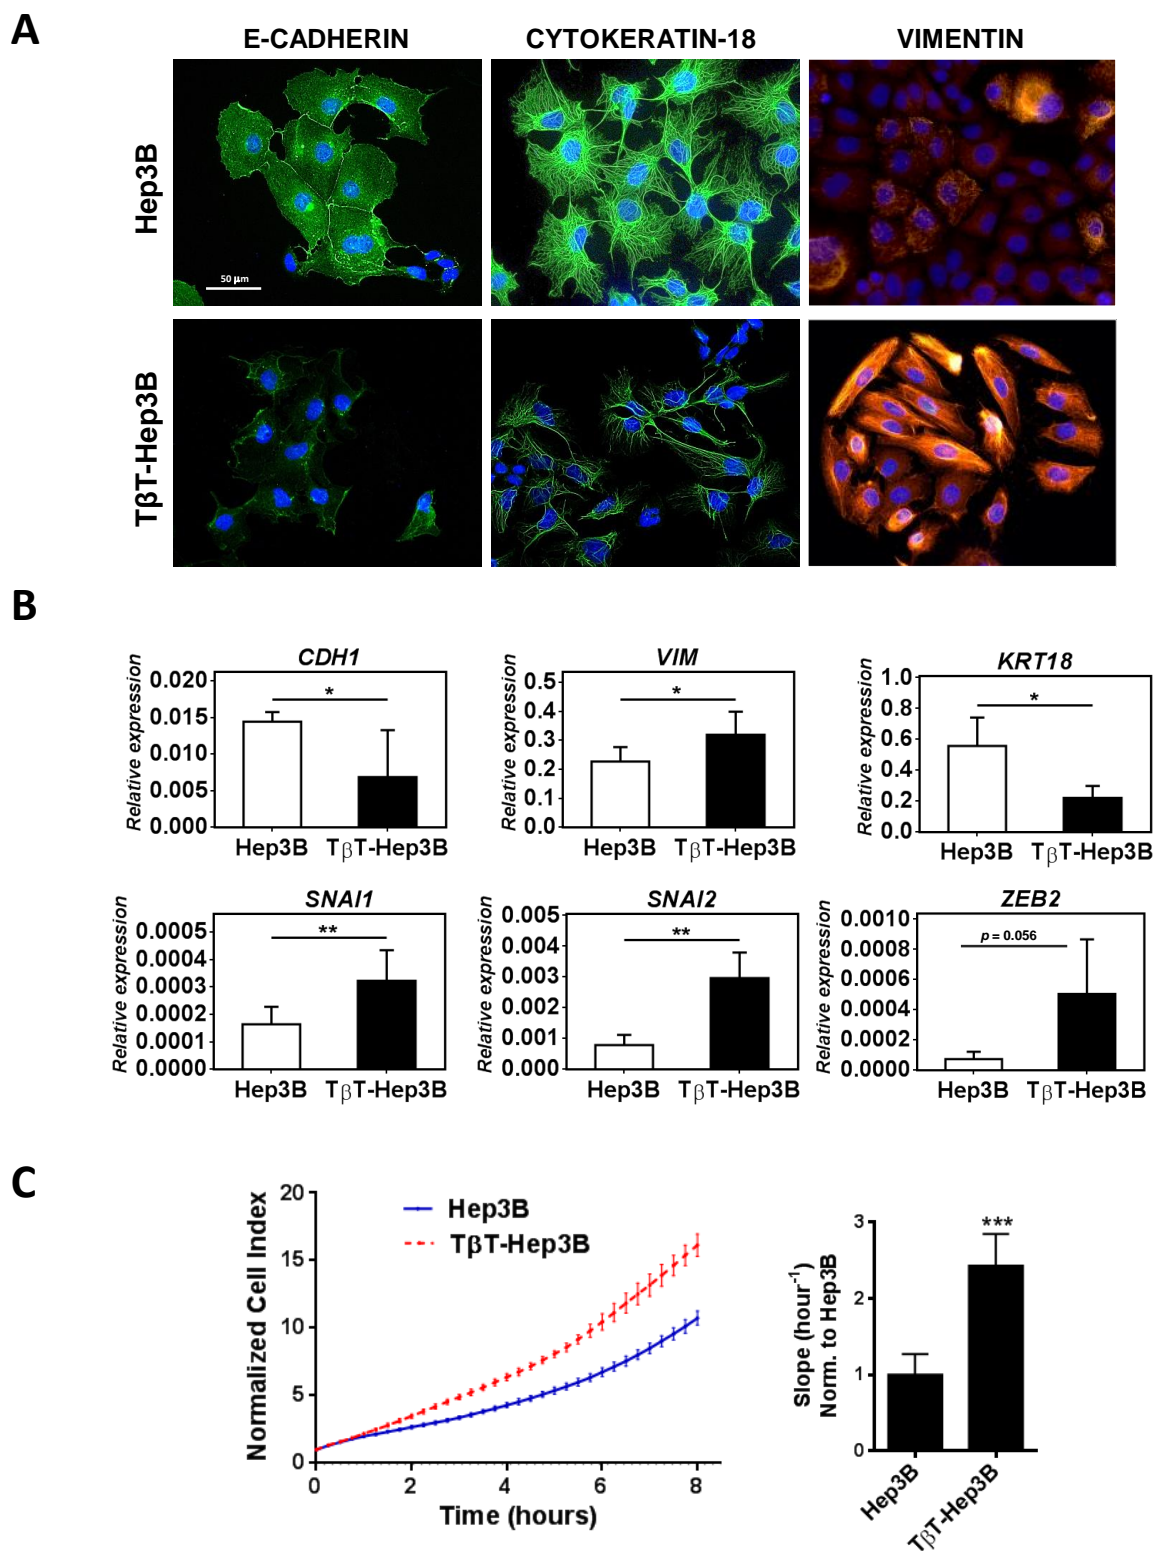

**Figure S2 - Generation of TβT-Hep3B (Chronic TGF-β-treated Hep3B) cells.**

Hep3B cells were treated with TGF-β (2 ng/ml) for two weeks. Media was replaced every two days. **(A.)** Immunofluorescence analysis of E-cadherin (green), Cytokeratin 18 (green) and vimentin (orange). DAPI (blue). Scale bar represents 50 μm. **(B.)** mRNA expression levels of EMT-related genes (*CDH1*, *VIM*, *KRT18*) and EMT-inducing transcription factors (*SNAI1*, *SNAI2*, *ZEB2*) analysed by qRT-PCR and normalized to housekeeping gene L32. Mean±SD (n=3). \* $p < 0.05$ , \*\* $p < 0.01$  as compared to Hep3B. **(C.)** Analysis of cell migration by real-time assay (xCELLigence system) between Hep3B and TβT-Hep3B. Left: A representative experiment is shown. Right: Quantification as a slope (hour<sup>-1</sup>) of the first 8 hours of cell migration normalized to Hep3B. Mean±SD (n=3). \*\*\* $p < 0.001$  as compared to Hep3B.

A

| Statistical Comparisons<br>Welch's Two-Sample t-Test |                    |
|------------------------------------------------------|--------------------|
| Significantly Altered Biochemicals                   | TβT-Hep3B<br>Hep3B |
| Total biochemicals<br>$p \leq 0.05$                  | 151                |
| Biochemicals<br>(↑↓)                                 | 63 88              |
| Total biochemicals<br>$0.05 < p < 0.10$              | 78                 |
| Biochemicals<br>(↑↓)                                 | 50 28              |

B

TβT-Hep3B/Hep3B

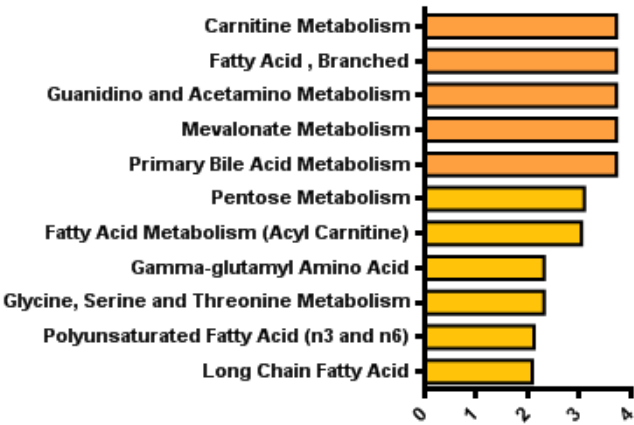

C

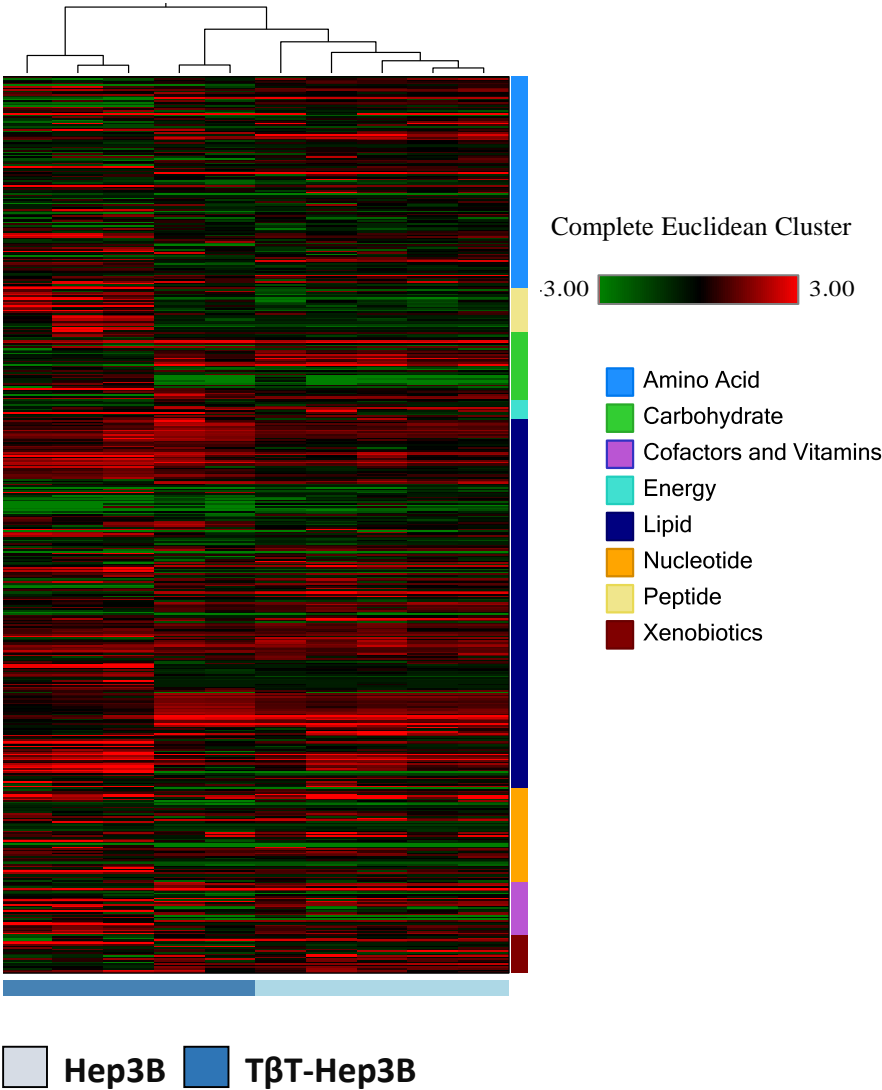

**Figure S3 - Metabolomic analysis of TβT-Hep3B/Hep3B cells.**  
**(A.)** A total of 561 metabolites were detected. Welch's two-sample *t*-test was used to identify biochemicals that differed significantly ( $p < 0.05$ ) and with approaching significance ( $0.05 < p > 0.10$ ) between experimental groups ( $n=5$  for each group). **(B.)** Pathway set enrichment analysis was performed using MetaboLync™ platform and followed formula: # of significant metabolites in pathway ( $k$ ) / total # of detected metabolites in pathway ( $m$ ) ) / [total # of significant metabolites ( $n$ ) / total # of detected metabolites( $N$ )] ( $k/m$ )/( $n/N$ ). **(C.)** Hierarchical clustering was performed using Euclidean distance method by Metabolon Inc.



**A**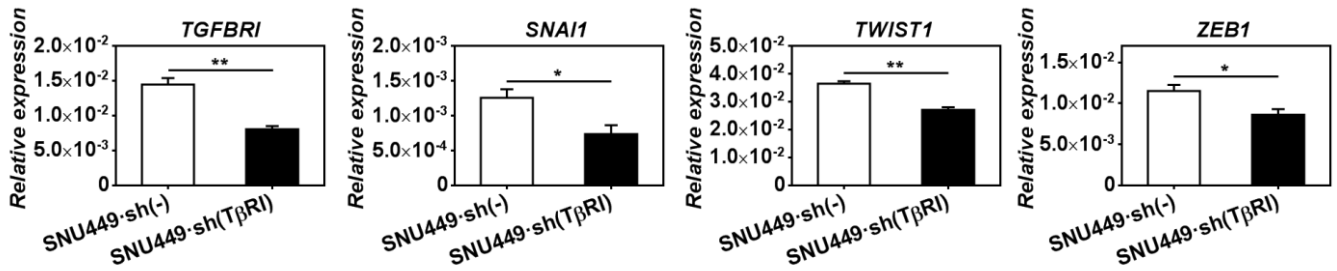**B**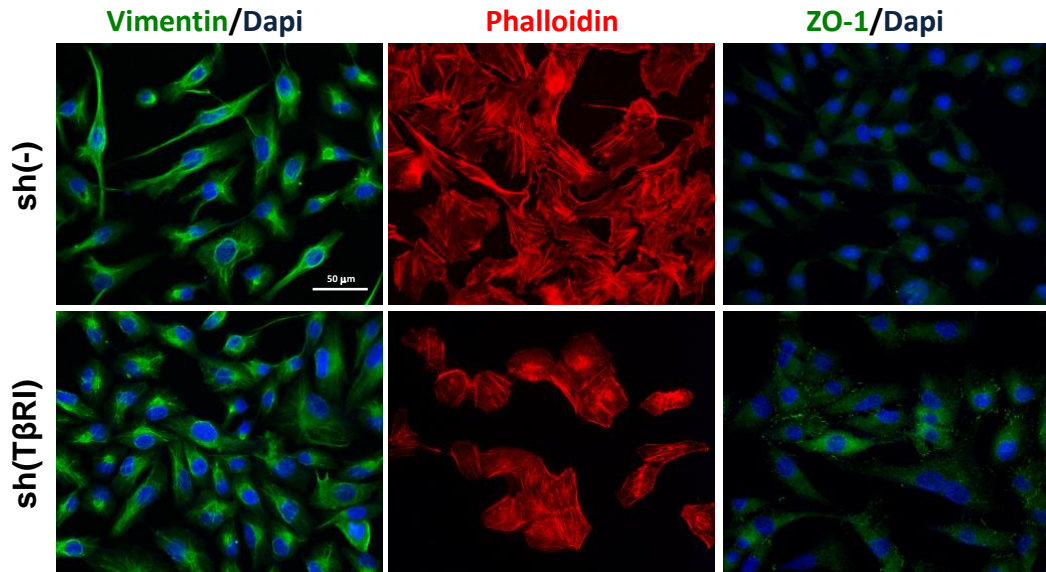**C**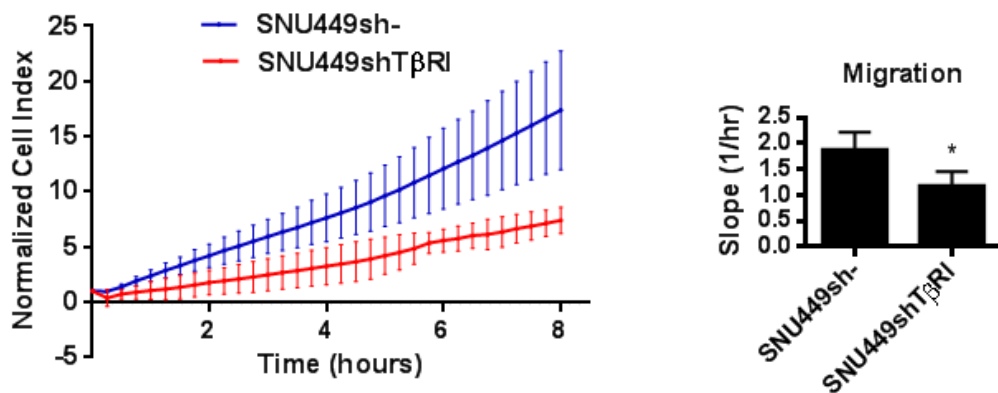

**Figure S4 – Effect of silencing the TGF-β receptor I (TβRI) in the mesenchymal HCC cell line SNU449.**

SNU449 cells, control (sh-) or stably silenced with specific TβRI shRNA (A.) mRNA expression levels of *TGFBR1* and the EMT-inducing transcription factors (*SNAIL1*, *TWIST1* and *ZEB1*) were detected by qRT-PCR and normalized to housekeeping gene L32. (B.): Immunofluorescence analysis of Vimentin and ZO1 (green) and staining analysis of F-Actin with phalloidin (red), DAPI (nuclei) in blue. Scale bar represents 50 μm. (C.) Analysis of cell migration by real-time assay (xCELLigence system) between Hep3B and TβT-Hep3B. Left: A representative experiment is shown. Right: Quantification as a slope (hour<sup>-1</sup>) of the first 8 hours of cell migration. In A. and C.: Mean±SD (n=3). \*p<0.05, \*\*p<0.01, \*\*\*p<0.001, compared as the graph indicates.

**Table S1.****List of detected metabolites in TβT-Hep3B compared to Hep3B**

| Sub Pathway                               | Biochemical Name                           | TβT-Hep3B<br>Hep3B | p value |
|-------------------------------------------|--------------------------------------------|--------------------|---------|
| Short Chain Fatty Acid                    | valerate                                   | 1.40               | 0.2504  |
| Medium Chain Fatty Acid                   | caproate (6:0)                             | 1.52               | 0.0839  |
|                                           | caprylate (8:0)                            | 1.43               | 0.1645  |
|                                           | laurate (12:0)                             | 1.10               | 0.9904  |
|                                           | 5-dodecenoate (12:1n7)                     | 1.15               | 0.6963  |
| Long Chain Fatty Acid                     | myristate (14:0)                           | 1.32               | 0.1339  |
|                                           | myristoleate (14:1n5)                      | 1.24               | 0.5979  |
|                                           | pentadecanoate (15:0)                      | 1.32               | 0.0179  |
|                                           | palmitate (16:0)                           | 1.15               | 0.2517  |
|                                           | palmitoleate (16:1n7)                      | 1.22               | 0.3616  |
|                                           | margarate (17:0)                           | 1.76               | 0.0061  |
|                                           | 10-heptadecenoate (17:1n7)                 | 1.51               | 0.0031  |
|                                           | stearate (18:0)                            | 1.43               | 0.0066  |
|                                           | nonadecanoate (19:0)                       | 1.26               | 0.1043  |
|                                           | 10-nonadecenoate (19:1n9)                  | 3.05               | 0.0003  |
|                                           | arachidate (20:0)                          | 1.23               | 0.1794  |
|                                           | eicosenoate (20:1)                         | 2.30               | 0.0001  |
|                                           | tricosenoate (23:1)                        | 2.68               | 0.0039  |
|                                           | behenate (22:0)                            | 1.96               | 0.1175  |
|                                           | erucate (22:1n9)                           | 1.76               | 0.0007  |
|                                           | oleate/vaccenate (18:1)                    | 1.72               | 0.0005  |
| Polyunsaturated Fatty Acid (n3<br>and n6) | stearidonate (18:4n3)                      | 1.51               | 0.0908  |
|                                           | eicosapentaenoate (EPA; 20:5n3)            | 0.80               | 0.2494  |
|                                           | docosapentaenoate (n3 DPA; 22:5n3)         | 2.78               | 0.0081  |
|                                           | docosahexaenoate (DHA; 22:6n3)             | 0.96               | 0.7408  |
|                                           | docosatrienoate (22:3n3)                   | 2.32               | 0.0079  |
|                                           | linoleate (18:2n6)                         | 1.52               | 0.0027  |
|                                           | linolenate [alpha or gamma; (18:3n3 or 6)] | 1.30               | 0.1831  |
|                                           | dihomo-linolenate (20:3n3 or n6)           | 1.92               | 0.0429  |
|                                           | arachidonate (20:4n6)                      | 0.95               | 0.8391  |
|                                           | adrenate (22:4n6)                          | 6.13               | 0.1290  |
|                                           | docosapentaenoate (n6 DPA; 22:5n6)         | 2.18               | 0.0284  |
|                                           | docosadienoate (22:2n6)                    | 2.57               | 0.0000  |
|                                           | dihomo-linoleate (20:2n6)                  | 3.09               | 0.0007  |
|                                           | mead acid (20:3n9)                         | 1.91               | 0.0053  |
| Fatty Acid, Branched                      | 13-methylmyristate                         | 1.73               | 0.0005  |
|                                           | 15-methylpalmitate                         | 1.67               | 0.0002  |
|                                           | 17-methylstearate                          | 1.94               | 0.0071  |
| Fatty Acid, Dicarboxylate                 | 2-hydroxyglutarate                         | 0.31               | 0.0051  |
|                                           | 2-hydroxyadipate                           | 0.56               | 0.1234  |
|                                           | maleate                                    | 0.80               | 0.2015  |
|                                           | pinelate (heptanedioate)                   | 2.30               | 0.0410  |
| Fatty Acid Metabolism                     | acetyl CoA                                 | 1.00               | ---     |
| Fatty Acid Metabolism (also               | butyrylcarnitine                           | 0.13               | 0.0729  |
|                                           | butyrylglycine                             | 1.20               | 0.3737  |

|                                       |                                            |      |        |
|---------------------------------------|--------------------------------------------|------|--------|
| BCAA Metabolism)                      | propionylcarnitine                         | 0.88 | 0.3739 |
|                                       | methylmalonate (MMA)                       | 8.03 | 0.0221 |
| Fatty Acid Metabolism(Acyl Glycine)   | N-palmitoylglycine                         | 1.00 | ---    |
| Fatty Acid Metabolism(Acyl Carnitine) | acetylcarnitine                            | 0.37 | 0.0133 |
|                                       | 3-hydroxybutyrylcarnitine (1)              | 0.29 | 0.0303 |
|                                       | 3-hydroxybutyrylcarnitine (2)              | 0.20 | 0.0289 |
|                                       | hexanoylcarnitine                          | 0.12 | 0.0016 |
|                                       | myristoylcarnitine                         | 0.38 | 0.0098 |
|                                       | palmitoylcarnitine                         | 0.30 | 0.0182 |
|                                       | palmitoleoylcarnitine                      | 0.25 | 0.0003 |
|                                       | stearoylcarnitine                          | 0.78 | 0.2586 |
|                                       | linoleoylcarnitine                         | 0.64 | 0.0292 |
|                                       | oleoylcarnitine                            | 0.18 | 0.0207 |
|                                       | myristoleoylcarnitine                      | 1.36 | 0.3272 |
| Carnitine Metabolism                  | deoxycarnitine                             | 0.53 | 0.0015 |
|                                       | carnitine                                  | 0.63 | 0.0197 |
| Fatty Acid, Monohydroxy               | 4-hydroxybutyrate (GHB)                    | 4.86 | 0.0964 |
|                                       | 2-hydroxypalmitate                         | 1.54 | 0.1974 |
|                                       | 2-hydroxystearate                          | 1.66 | 0.1807 |
|                                       | 3-hydroxyhexanoate                         | 1.67 | 0.0036 |
|                                       | 3-hydroxyoctanoate                         | 1.52 | 0.0253 |
|                                       | 3-hydroxydecanoate                         | 1.63 | 0.0076 |
|                                       | 3-hydroxylaurate                           | 1.10 | 0.6897 |
|                                       | 3-hydroxypalmitate                         | 0.89 | 0.2564 |
|                                       | 13-HODE + 9-HODE                           | 1.05 | 0.4504 |
|                                       | 3-hydroxystearate                          | 0.59 | 0.3031 |
| Inositol Metabolism                   | myo-inositol                               | 0.55 | 0.0003 |
|                                       | inositol 1-phosphate (I1P)                 | 0.66 | 0.0887 |
|                                       | choline                                    | 1.03 | 0.7164 |
|                                       | choline phosphate                          | 0.79 | 0.1359 |
|                                       | cytidine 5'-diphosphocholine               | 1.20 | 0.7929 |
|                                       | glycerophosphorylcholine (GPC)             | 5.75 | 0.1725 |
|                                       | phosphoethanolamine                        | 0.33 | 0.0054 |
|                                       | cytidine-5'-diphosphoethanolamine          | 0.45 | 0.0326 |
|                                       | glycerophosphoethanolamine                 | 0.90 | 0.7911 |
|                                       | trimethylamine N-oxide                     | 0.93 | 0.4093 |
|                                       | glycerophosphoinositol                     | 0.71 | 0.6835 |
|                                       | 1,2-dipalmitoyl-GPC (16:0/16:0)            | 0.59 | 0.0653 |
|                                       | 1-palmitoyl-2-oleoyl-GPC (16:0/18:1)       | 1.09 | 0.1505 |
|                                       | 1-palmitoyl-2-linoleoyl-GPC (16:0/18:2)    | 0.75 | 0.0309 |
|                                       | 1-stearoyl-2-arachidonoyl-GPC (18:0/20:4)  | 2.29 | 0.0942 |
|                                       | 1-stearoyl-2-oleoyl-GPC (18:0/18:1)        | 2.72 | 0.0566 |
|                                       | 1-stearoyl-2-oleoyl-GPI (18:0/18:1)        | 2.06 | 0.0733 |
|                                       | 1,2-dioleoyl-GPC (18:1/18:1)               | 2.48 | 0.0535 |
|                                       | 1-palmitoyl-2-arachidonoyl-GPC (16:0/20:4) | 0.82 | 0.2087 |
|                                       | 1-stearoyl-2-linoleoyl-GPC (18:0/18:2)     | 1.85 | 0.0992 |
|                                       | 1-palmitoleoyl-2-oleoyl-GPC (16:1/18:1)    | 1.28 | 0.2020 |
|                                       | 1-palmitoyl-2-palmitoleoyl-GPC (16:0/16:1) | 0.60 | 0.0306 |

|                         |                                                  |      |        |
|-------------------------|--------------------------------------------------|------|--------|
| Phospholipid Metabolism | 1-stearoyl-2-arachidonoyl-GPI (18:0/20:4)        | 0.69 | 0.0363 |
|                         | 1-oleoyl-2-linoleoyl-GPC (18:1/18:2)             | 1.20 | 0.0802 |
|                         | 1-palmitoyl-2-arachidonoyl-GPI (16:0/20:4)       | 0.51 | 0.0414 |
|                         | 1-palmitoyl-2-oleoyl-GPG (16:0/18:1)             | 0.76 | 0.2119 |
|                         | 1-palmitoyl-2-oleoyl-GPE (16:0/18:1)             | 0.72 | 0.0496 |
|                         | 1-stearoyl-2-arachidonoyl-GPE (18:0/20:4)        | 0.83 | 0.1658 |
|                         | 1-stearoyl-2-oleoyl-GPE (18:0/18:1)              | 2.65 | 0.0402 |
|                         | 1-palmitoyl-2-arachidonoyl-GPE (16:0/20:4)       | 0.44 | 0.0306 |
|                         | 1-palmitoyl-2-linoleoyl-GPE (16:0/18:2)          | 0.43 | 0.0273 |
|                         | 1-stearoyl-2-linoleoyl-GPE (18:0/18:2)           | 0.79 | 0.0857 |
|                         | 1-palmitoyl-2-stearoyl-GPC (16:0/18:0)           | 0.60 | 0.0356 |
|                         | 1,2-dioleoyl-GPE (18:1/18:1)                     | 1.67 | 0.0026 |
|                         | 1-palmitoyl-2-oleoyl-GPI (16:0/18:1)             | 3.13 | 0.0170 |
|                         | 1,2-dioleoyl-GPS (18:1/18:1)                     | 2.00 | 0.0503 |
|                         | 1-palmitoyl-2-alpha-linolenoyl-GPC (16:0/18:3n3) | 0.77 | 0.1573 |
|                         | 1-palmitoleoyl-2-linoleoyl-GPC (16:1/18:2)       | 0.59 | 0.0043 |
|                         | 1-palmitoleoyl-2-linolenoyl-GPC (16:1/18:3)      | 0.40 | 0.0415 |
|                         | 1,2-dilinoeoyl-GPC (18:2/18:2)                   | 1.06 | 0.5679 |
|                         | 1-oleoyl-2-linoleoyl-GPE (18:1/18:2)             | 0.67 | 0.0552 |
|                         | 1,2-distearoyl-GPC (18:0/18:0)                   | 0.42 | 0.0341 |
|                         | 1-palmitoyl-2-oleoyl-GPS (16:0/18:1)             | 0.68 | 0.0579 |
|                         | 1-stearoyl-2-linoleoyl-GPS (18:0/18:2)           | 1.29 | 0.1616 |
|                         | oleoylcholine                                    | 1.32 | 0.8961 |
|                         | palmitoleoylcholine                              | 0.89 | 0.7288 |
|                         | 1-palmitoyl-2-gamma-linolenoyl-GPC (16:0/18:3n6) | 0.56 | 0.0026 |
| Phosphatidylserine (PS) | 1-stearoyl-2-arachidonoyl-GPS (18:0/20:4)        | 0.70 | 0.1537 |
|                         | 1-stearoyl-2-oleoyl-GPS (18:0/18:1)              | 3.81 | 0.0551 |
| Lysolipid               | 1-palmitoyl-GPC (16:0)                           | 0.60 | 0.0275 |
|                         | 2-palmitoyl-GPC (16:0)                           | 0.84 | 0.2420 |
|                         | 1-palmitoleoyl-GPC (16:1)                        | 0.48 | 0.0038 |
|                         | 2-palmitoleoyl-GPC (16:1)                        | 1.19 | 0.2436 |
|                         | 1-stearoyl-GPC (18:0)                            | 1.10 | 0.7946 |
|                         | 1-oleoyl-GPC (18:1)                              | 1.05 | 0.6838 |
|                         | 1-linoleoyl-GPC (18:2)                           | 0.90 | 0.4276 |
|                         | 1-arachidonoyl-GPC (20:4n6)                      | 1.60 | 0.0902 |
|                         | 1-lignoceroyl-GPC (24:0)                         | 8.62 | 0.0804 |
|                         | 1-palmitoyl-GPE (16:0)                           | 0.30 | 0.0224 |
|                         | 1-stearoyl-GPE (18:0)                            | 0.52 | 0.0035 |
|                         | 2-stearoyl-GPE (18:0)                            | 0.47 | 0.0080 |
|                         | 1-oleoyl-GPE (18:1)                              | 0.74 | 0.0945 |
|                         | 1-linoleoyl-GPE (18:2)                           | 0.84 | 0.3231 |
|                         | 1-arachidonoyl-GPE (20:4n6)                      | 0.98 | 0.8755 |
|                         | 1-palmitoyl-GPI (16:0)                           | 1.13 | 0.6493 |
|                         | 1-stearoyl-GPI (18:0)                            | 1.41 | 0.1793 |
|                         | 1-oleoyl-GPI (18:1)                              | 2.58 | 0.0112 |
|                         | 1-arachidonoyl-GPI (20:4)                        | 1.48 | 0.0909 |
|                         | 1-stearoyl-GPS (18:0)                            | 0.58 | 0.0135 |

|                         |                                                       |       |        |
|-------------------------|-------------------------------------------------------|-------|--------|
|                         | 1-oleoyl-GPS (18:1)                                   | 2.07  | 0.0824 |
|                         | 1-palmitoyl-GPG (16:0)                                | 0.89  | 0.5518 |
|                         | 1-palmitoyl-GPS (16:0)                                | 0.34  | 0.0342 |
|                         | 1-stearoyl-GPG (18:0)                                 | 1.00  | ---    |
|                         | 1-oleoyl-GPG (18:1)                                   | 1.13  | 0.6704 |
|                         | 1-linoleoyl-GPG (18:2)                                | 1.10  | 0.8341 |
| Plasmalogen             | 1-(1-enyl-palmitoyl)-2-oleoyl-GPE (P-16:0/18:1)       | 12.66 | 0.0552 |
|                         | 1-(1-enyl-palmitoyl)-2-linoleoyl-GPE (P-16:0/18:2)    | 26.21 | 0.0890 |
|                         | 1-(1-enyl-palmitoyl)-2-palmitoyl-GPC (P-16:0/16:0)    | 0.75  | 0.0187 |
|                         | 1-(1-enyl-palmitoyl)-2-palmitoleoyl-GPC (P-16:0/16:1) | 1.43  | 0.7890 |
|                         | 1-(1-enyl-palmitoyl)-2-arachidonoyl-GPE (P-16:0/20:4) | 0.85  | 0.3651 |
|                         | 1-(1-enyl-palmitoyl)-2-oleoyl-GPC (P-16:0/18:1)       | 1.95  | 0.2768 |
|                         | 1-(1-enyl-stearoyl)-2-oleoyl-GPE (P-18:0/18:1)        | 22.43 | 0.0208 |
|                         | 1-(1-enyl-stearoyl)-2-linoleoyl-GPE (P-18:0/18:2)     | 53.55 | 0.0153 |
|                         | 1-(1-enyl-palmitoyl)-2-arachidonoyl-GPC (P-16:0/20:4) | 1.00  | ---    |
|                         | 1-(1-enyl-stearoyl)-2-arachidonoyl-GPE (P-18:0/20:4)  | 0.87  | 0.2479 |
|                         |                                                       |       |        |
| Lysoplasmalogen         | 1-(1-enyl-palmitoyl)-GPC (P-16:0)                     | 1.38  | 0.1960 |
|                         | 1-(1-enyl-palmitoyl)-GPE (P-16:0)                     | 7.43  | 0.0886 |
|                         | 1-(1-enyl-oleoyl)-GPE (P-18:1)                        | 5.80  | 0.1412 |
|                         | 1-(1-enyl-stearoyl)-GPE (P-18:0)                      | 5.03  | 0.1057 |
|                         | 1-(1-enyl-oleoyl)-2-oleoyl-GPE (P-18:1/18:1)          | 59.98 | 0.0123 |
| Glycerolipid Metabolism | glycerol                                              | 4.35  | 0.0006 |
|                         | glycerol 3-phosphate                                  | 0.63  | 0.2377 |
|                         | glycerophosphoglycerol                                | 1.36  | 0.5881 |
| Monoacylglycerol        | 1-myristoylglycerol (14:0)                            | 1.14  | 0.6593 |
|                         | 2-myristoylglycerol (14:0)                            | 1.34  | 0.8906 |
|                         | 1-myristoleoylglycerol (14:1)                         | 0.66  | 0.1597 |
|                         | 1-pentadecanoylglycerol (15:0)                        | 1.00  | 0.6381 |
|                         | 1-palmitoylglycerol (16:0)                            | 1.04  | 0.5856 |
|                         | 2-palmitoylglycerol (16:0)                            | 1.27  | 0.9940 |
|                         | 1-margaroylglycerol (17:0)                            | 1.42  | 0.4550 |
|                         | 1-oleoylglycerol (18:1)                               | 1.23  | 0.9220 |
|                         | 2-oleoylglycerol (18:1)                               | 1.32  | 0.7477 |
|                         | 1-linoleoylglycerol (18:2)                            | 0.77  | 0.2275 |
|                         | 2-linoleoylglycerol (18:2)                            | 0.81  | 0.2623 |
|                         | 1-linolenoylglycerol (18:3)                           | 0.68  | 0.1573 |
|                         | 1-arachidonoylglycerol (20:4)                         | 0.78  | 0.2361 |
|                         | 2-arachidonoylglycerol (20:4)                         | 0.82  | 0.3202 |
|                         | 1-docosaheptaenoylglycerol (22:6)                     | 0.66  | 0.1383 |
|                         | 1-dihomo-linolenoylglycerol (20:3)                    | 0.78  | 0.2203 |
|                         | 2-docosaheptaenoylglycerol (22:6)                     | 0.72  | 0.1949 |
|                         | 1-palmitoleoylglycerol (16:1)                         | 0.75  | 0.1916 |
|                         | 2-palmitoleoylglycerol (16:1)                         | 0.79  | 0.2169 |
|                         | 1-eicosapentaenoylglycerol (20:5)                     | 0.62  | 0.1297 |
|                         | 2-eicosapentaenoylglycerol (20:5)                     | 0.65  | 0.1938 |

|                                                      |                                                                                                |       |        |
|------------------------------------------------------|------------------------------------------------------------------------------------------------|-------|--------|
| Diacylglycerol                                       | palmitoleoyl-oleoyl-glycerol (16:1/18:1) [1]                                                   | 0.44  | 0.0492 |
|                                                      | oleoyl-linoleoyl-glycerol (18:1/18:2) [2]                                                      | 1.08  | 0.5366 |
|                                                      | palmitoleoyl-oleoyl-glycerol (16:1/18:1) [2]                                                   | 0.75  | 0.2098 |
|                                                      | palmitoyl-linoleoyl-glycerol (16:0/18:2) [1]                                                   | 0.34  | 0.0310 |
|                                                      | palmitoyl-linoleoyl-glycerol (16:0/18:2) [2]                                                   | 0.76  | 0.2265 |
| Sphingolipid Metabolism                              | N-palmitoyl-sphinganine (d18:0/16:0)                                                           | 1.65  | 0.1425 |
|                                                      | sphinganine                                                                                    | 2.01  | 0.0003 |
|                                                      | phytosphingosine                                                                               | 1.31  | 0.8474 |
|                                                      | palmitoyl sphingomyelin (d18:1/16:0)                                                           | 1.46  | 0.1420 |
|                                                      | stearoyl sphingomyelin (d18:1/18:0)                                                            | 1.47  | 0.3705 |
|                                                      | sphingomyelin (d18:1/18:1, d18:2/18:0)                                                         | 1.43  | 0.2397 |
|                                                      | sphingosine                                                                                    | 1.90  | 0.0012 |
|                                                      | N-palmitoyl-sphingosine (d18:1/16:0)                                                           | 2.50  | 0.0495 |
|                                                      | sphingomyelin (d18:1/14:0, d16:1/16:0)                                                         | 1.06  | 0.2318 |
|                                                      | sphingomyelin (d18:2/14:0, d18:1/14:1)                                                         | 1.54  | 0.0557 |
|                                                      | sphingomyelin (d18:1/24:1, d18:2/24:0)                                                         | 1.36  | 0.7458 |
|                                                      | sphingomyelin (d18:2/16:0, d18:1/16:1)                                                         | 1.19  | 0.4829 |
|                                                      | sphingomyelin (d18:1/20:1, d18:2/20:0)                                                         | 0.78  | 0.1103 |
|                                                      | behenoyl sphingomyelin (d18:1/22:0)                                                            | 0.89  | 0.4427 |
|                                                      | sphingomyelin (d18:1/22:1, d18:2/22:0, d16:1/24:1)                                             | 0.99  | 0.7914 |
|                                                      | sphingomyelin (d18:1/20:0, d16:1/22:0)                                                         | 0.74  | 0.0405 |
|                                                      | palmitoyl dihydrosphingomyelin (d18:0/16:0)                                                    | 0.70  | 0.0452 |
|                                                      | sphingomyelin (d18:1/15:0, d16:1/17:0)                                                         | 1.01  | 0.8567 |
|                                                      | sphingomyelin (d18:1/21:0, d17:1/22:0, d16:1/23:0)                                             | 1.09  | 0.6043 |
|                                                      | sphingomyelin (d18:2/23:0, d18:1/23:1, d17:1/24:1)                                             | 1.46  | 0.3541 |
|                                                      | sphingomyelin (d18:2/24:1, d18:1/24:2)                                                         | 1.59  | 0.5426 |
|                                                      | tricosanoyl sphingomyelin (d18:1/23:0)                                                         | 1.02  | 0.9753 |
|                                                      | sphingomyelin (d18:1/17:0, d17:1/18:0, d19:1/16:0)                                             | 3.88  | 0.0901 |
|                                                      | glycosyl-N-stearoyl-sphingosine                                                                | 11.31 | 0.0459 |
|                                                      | glycosyl-N-palmitoyl-sphingosine                                                               | 4.08  | 0.0159 |
|                                                      | lactosyl-N-palmitoyl-sphingosine                                                               | 4.27  | 0.0088 |
| Mevalonate Metabolism                                | 3-hydroxy-3-methylglutarate                                                                    | 0.38  | 0.0007 |
| Glycolysis, Gluconeogenesis, and Pyruvate Metabolism | glucose                                                                                        | 0.94  | 0.5541 |
|                                                      | glucose 6-phosphate                                                                            | 4.49  | 0.0673 |
|                                                      | fructose-6-phosphate                                                                           | 2.22  | 0.0323 |
|                                                      | Isobar: fructose 1,6-diphosphate, glucose 1,6-diphosphate, myo-inositol 1,4 or 1,3-diphosphate | 0.56  | 0.1159 |
|                                                      | dihydroxyacetone phosphate (DHAP)                                                              | 0.77  | 0.2202 |
|                                                      | 3-phosphoglycerate                                                                             | 0.99  | 0.6846 |
|                                                      | phosphoenolpyruvate (PEP)                                                                      | 0.62  | 0.0736 |
|                                                      | pyruvate                                                                                       | 1.12  | 0.6783 |
|                                                      | lactate                                                                                        | 0.81  | 0.0830 |
|                                                      | glycerate                                                                                      | 2.02  | 0.1113 |
|                                                      | citrate                                                                                        | 0.50  | 0.0629 |
|                                                      | aconitate [cis or trans]                                                                       | 1.00  | 0.7524 |

|                           |                                    |       |        |
|---------------------------|------------------------------------|-------|--------|
| TCA Cycle                 | isocitrate                         | 1.16  | 0.3739 |
|                           | alpha-ketoglutarate                | 0.68  | 0.1351 |
|                           | succinylcarnitine                  | 1.09  | 0.7225 |
|                           | succinate                          | 0.46  | 0.0668 |
|                           | fumarate                           | 0.88  | 0.3338 |
|                           | malate                             | 0.89  | 0.4420 |
|                           | itaconate                          | 40.08 | 0.0329 |
|                           | 2-methylcitrate/homocitrate        | 1.10  | 0.3451 |
| Oxidative Phosphorylation | acetylphosphate                    | 0.70  | 0.1904 |
|                           | phosphate                          | 1.19  | 0.1575 |
| Glutamate Metabolism      | glutamate                          | 0.74  | 0.0234 |
|                           | glutamine                          | 0.97  | 0.6107 |
|                           | N-acetylglutamate                  | 0.24  | 0.0157 |
|                           | N-acetylglutamine                  | 0.43  | 0.0411 |
|                           | N-acetyl-aspartyl-glutamate (NAAG) | 0.36  | 0.0391 |
|                           | gamma-aminobutyrate (GABA)         | 1.58  | 0.3181 |
|                           | 4-hydroxyglutamate                 | 8.55  | 0.0002 |
|                           | glutamate, gamma-methyl ester      | 2.21  | 0.1721 |
|                           | pyroglutamine*                     | 0.82  | 0.2281 |
|                           | gamma-carboxyglutamate             | 1.49  | 0.1142 |
|                           | S-1-pyrroline-5-carboxylate        | 1.82  | 0.2485 |

List of detected metabolites. Statistical comparison of fold-changes between groups (TβT-Hep3B/Hep3B) was performed by Welch's two-sample t-test.  $p < 0.05$  was considered significant. Values  $< 1$  indicate lower levels (green shading colour when significant) and values  $> 1$  indicate higher levels (red shading colour when significant) as compared to Hep3B.

**Table S2.**

List of analyzed genes in TβT-Hep3B and compared to Hep3B

| Sub pathway             | Symbol        | GenBank      | Description                                          | TβT-Hep3B<br>Hep3B | p-value |
|-------------------------|---------------|--------------|------------------------------------------------------|--------------------|---------|
| Acetyl-CoA transferases | <i>ACAA1</i>  | NM_001607    | Acetyl-CoA acyltransferase 1                         | 1.49               | 0.0554  |
|                         | <i>ACAA2</i>  | NM_006111    | Acetyl-CoA acyltransferase 2                         | 0.86               | 0.2428  |
|                         | <i>ACAT1</i>  | NM_000019    | Acetyl-CoA acetyltransferase 1                       | 0.98               | 0.8353  |
|                         | <i>ACAT2</i>  | NM_005891    | Acetyl-CoA acetyltransferase 2                       | 1.91               | 0.0015  |
| Acyl-CoA dehydrogenases | <i>ACAD9</i>  | NM_014049    | Acyl-CoA dehydrogenase family, member 9              | 1.18               | 0.1576  |
|                         | <i>ACAD10</i> | NM_025247    | Acyl-CoA dehydrogenase family, member 10             | 1.36               | 0.1942  |
|                         | <i>ACAD11</i> | NM_032169    | Acyl-CoA dehydrogenase family, member 11             | 1.59               | 0.0127  |
|                         | <i>ACADL</i>  | NM_001608    | Acyl-CoA dehydrogenase, long chain                   | 0.01               | 0.0883  |
|                         | <i>ACADM</i>  | NM_000016    | Acyl-CoA dehydrogenase, C-4 to C-12 straight chain   | 1.31               | 0.4198  |
|                         | <i>ACADS</i>  | NM_000017    | Acyl-CoA dehydrogenase, C-2 to C-3 short chain       | 1.23               | 0.3524  |
|                         | <i>ACADSB</i> | NM_001609    | Acyl-CoA dehydrogenase, short/branched chain         | 1.03               | 0.7327  |
|                         | <i>ACADVL</i> | NM_000018    | Acyl-CoA dehydrogenase, very long chain              | 1.80               | 0.0110  |
|                         | <i>EHHADH</i> | NM_001966    | Enoyl-CoA, hydratase/3-hydroxyacyl CoA dehydrogenase | 1.69               | 0.0444  |
|                         | <i>GCDH</i>   | NM_000159    | Glutaryl-CoA dehydrogenase                           | 1.06               | 0.7648  |
| Acyl-CoA oxidases       | <i>ACOX1</i>  | NM_004035    | Acyl-CoA oxidase 1, palmitoyl                        | 0.85               | 0.1596  |
|                         | <i>ACOX2</i>  | NM_003500    | Acyl-CoA oxidase 2, branched chain                   | 0.79               | 0.5230  |
|                         | <i>ACOX3</i>  | NM_003501    | Acyl-CoA oxidase 3, pristanoyl                       | 1.16               | 0.3687  |
| Acyl-CoA synthetases    | <i>ACACA</i>  | NM_198834    | Acetyl-CoA Carboxylase Alpha                         | 1.32               | 0.7337  |
|                         | <i>ACACB</i>  | NM_001093    | Acetyl-CoA Carboxylase Beta                          | 2.31               | 0.3639  |
|                         | <i>ACLY</i>   | NM_001096    | ATP citrate lyase                                    | 1.36               | 0.0456  |
|                         | <i>ACSBG1</i> | NM_015162    | Acyl-CoA synthetase bubblegum family member 1        | N/A                | N/A     |
|                         | <i>ACSBG2</i> | NM_030924    | Acyl-CoA synthetase bubblegum family member 2        | N/A                | N/A     |
|                         | <i>ACSL1</i>  | NM_001995    | Acyl-CoA synthetase long-chain family member 1       | 0.38               | 0.0025  |
|                         | <i>ACSL3</i>  | NM_004457    | Acyl-CoA synthetase long-chain family member 3       | 2.42               | 0.0003  |
|                         | <i>ACSL4</i>  | NM_004458    | Acyl-CoA synthetase long-chain family member 4       | 1.26               | 0.1378  |
|                         | <i>ACSL5</i>  | NM_016234    | Acyl-CoA synthetase long-chain family member 5       | 5.60               | 0.0008  |
|                         | <i>ACSL6</i>  | NM_001009185 | Acyl-CoA synthetase long-chain family member 6       | 2.23               | 0.0168  |
|                         | <i>ACSM3</i>  | NM_005622    | Acyl-CoA synthetase medium-chain family member 3     | 3.05               | 0.1646  |
|                         | <i>ACSM4</i>  | NM_001080454 | Acyl-CoA synthetase medium-chain family member 4     | N/A                | N/A     |
|                         | <i>ACSM5</i>  | NM_017888    | Acyl-CoA synthetase medium-chain family member 5     | N/A                | N/A     |
| Acyl-CoA thioesterases  | <i>ACOT1</i>  | NM_001037161 | Acyl-CoA thioesterase 1                              | 1.37               | 0.1767  |
|                         | <i>ACOT6</i>  | NM_001037162 | Acyl-CoA thioesterase 6                              | N/A                | N/A     |
|                         | <i>ACOT7</i>  | NM_181866    | Acyl-CoA thioesterase 7                              | 0.94               | 0.6966  |
|                         | <i>ACOT8</i>  | NM_005469    | Acyl-CoA thioesterase 8                              | 1.67               | 0.0109  |
|                         | <i>ACOT9</i>  | NM_001033583 | Acyl-CoA thioesterase 9                              | 0.97               | 0.7930  |
|                         | <i>ACOT12</i> | NM_130767    | Acyl-CoA thioesterase 12                             | N/A                | N/A     |
|                         | <i>CPT1A</i>  | NM_001876    | Carnitine palmitoyltransferase 1A (liver)            | 0.82               | 0.1909  |
|                         | <i>CPT1B</i>  | NM_004377    | Carnitine palmitoyltransferase 1B (muscle)           | N/A                | N/A     |
|                         | <i>CPT1C</i>  | NM_152359    | Carnitine palmitoyltransferase 1C                    | N/A                | N/A     |



|                         |                |              |                                                                         |      |        |
|-------------------------|----------------|--------------|-------------------------------------------------------------------------|------|--------|
| Fatty acid transport    | <i>CPT2</i>    | NM_000098    | Carnitine palmitoyltransferase 2                                        | 1.06 | 0.8746 |
|                         | <i>CRAT</i>    | NM_000755    | Carnitine O-acetyltransferase                                           | 2.39 | 0.0025 |
|                         | <i>CROT</i>    | NM_021151    | Carnitine O-octanoyltransferase                                         | 1.16 | 0.1913 |
|                         | <i>FABP1</i>   | NM_001443    | Fatty acid binding protein 1, liver                                     | 4.68 | 0.0002 |
|                         | <i>FABP2</i>   | NM_000134    | Fatty acid binding protein 2, intestinal                                | N/A  | N/A    |
|                         | <i>FABP3</i>   | NM_004102    | Fatty acid binding protein 3, muscle and heart (mammary-derived growth) | 2.01 | 0.0092 |
|                         | <i>FABP4</i>   | NM_001442    | Fatty acid binding protein 4, adipocyte                                 | N/A  | N/A    |
|                         | <i>FABP5</i>   | NM_001444    | Fatty acid binding protein 5 (psoriasis-associated)                     | 1.29 | 0.2563 |
|                         | <i>FABP6</i>   | NM_001445    | Fatty acid binding protein 6, ileal                                     | 1.41 | 0.1823 |
|                         | <i>FABP7</i>   | NM_001446    | Fatty acid binding protein 7, brain                                     | N/A  | N/A    |
|                         | <i>SLC27A1</i> | NM_198580    | Solute carrier family 27 (fatty acid transporter), member 1             | 3.82 | 0.0289 |
|                         | <i>SLC27A2</i> | NM_003645    | Solute carrier family 27 (fatty acid transporter), member 2             | 0.99 | 0.9481 |
|                         | <i>SLC27A3</i> | NM_024330    | Solute carrier family 27 (fatty acid transporter), member 3             | 1.63 | 0.1217 |
|                         | <i>SLC27A4</i> | NM_005094    | Solute carrier family 27 (fatty acid transporter), member 4             | 1.43 | 0.0163 |
|                         | <i>SLC27A5</i> | NM_012254    | Solute carrier family 27 (fatty acid transporter), member 5             | 1.76 | 0.0058 |
|                         | <i>SLC27A6</i> | NM_014031    | Solute carrier family 27 (fatty acid transporter), member 6             | N/A  | N/A    |
| Biosynthesis regulation | <i>FASN</i>    | NM_004104    | Fatty acid synthase                                                     | 1.14 | 0.5467 |
|                         | <i>PPAR α</i>  | NM_001001928 | Peroxisome proliferator-activated receptor alpha                        | 1.67 | 0.3758 |
|                         | <i>PPAR γ</i>  | NM_138712.3  | Peroxisome proliferator-activated receptor gamma                        | 2.65 | 0.0815 |
|                         | <i>PPAR δ</i>  | NM_006238.4  | Peroxisome proliferator-activated receptor delta                        | 1.40 | 0.4283 |
|                         | <i>PRKAA1</i>  | NM_006251    | Protein kinase, AMP-activated, alpha 1 catalytic subunit                | 1.21 | 0.0501 |
|                         | <i>PRKAA2</i>  | NM_006252    | Protein kinase, AMP-activated, alpha 2 catalytic subunit                | 0.76 | 0.0277 |
|                         | <i>PRKAB1</i>  | NM_006253    | Protein kinase, AMP-activated, beta 1 non-catalytic subunit             | 1.47 | 0.0379 |
|                         | <i>PRKAB2</i>  | NM_005399    | Protein kinase, AMP-activated, beta 2 non-catalytic subunit             | 0.81 | 0.0186 |
|                         | <i>PRKACA</i>  | NM_002730    | Protein kinase, cAMP-dependent, catalytic, alpha                        | 1.12 | 0.5596 |
|                         | <i>PRKACB</i>  | NM_182948    | Protein kinase, cAMP-dependent, catalytic, beta                         | 1.01 | 0.8986 |
|                         | <i>PRKAG1</i>  | NM_002733    | Protein kinase, AMP-activated, gamma 1 non-catalytic subunit            | 1.33 | 0.0048 |
|                         | <i>PRKAG2</i>  | NM_016203    | Protein kinase, AMP-activated, gamma 2 non-catalytic subunit            | 2.36 | 0.0004 |
|                         | <i>PRKAG3</i>  | NM_017431    | Protein kinase, AMP-activated, gamma 3 non-catalytic subunit            | N/A  | N/A    |
| Ketogenesis             | <i>BDH1</i>    | NM_004051    | 3-hydroxybutyrate dehydrogenase, type 1                                 | 1.01 | 0.8478 |
|                         | <i>BDH2</i>    | NM_020139    | 3-hydroxybutyrate dehydrogenase, type 2                                 | 0.95 | 0.6457 |
|                         | <i>HMGCL</i>   | NM_000191    | 3-hydroxymethyl-3-methylglutaryl-CoA lyase                              | 1.65 | 0.0080 |
|                         | <i>HMGCS1</i>  | NM_002130    | 3-hydroxy-3-methylglutaryl-CoA synthase 1 (soluble)                     | 2.13 | 0.0148 |
|                         | <i>HMGCS2</i>  | NM_005518    | 3-hydroxy-3-methylglutaryl-CoA synthase 2 (mitochondrial)               | N/A  | N/A    |
|                         | <i>OXCT2</i>   | NM_022120    | 3-oxoacid CoA transferase 2                                             | 0.68 | 0.0800 |
| Triacylglycerol         | <i>GK</i>      | NM_000167    | Glycerol kinase                                                         | 0.85 | 0.6554 |
|                         | <i>GK2</i>     | NM_033214    | Glycerol kinase 2                                                       | N/A  | N/A    |
|                         | <i>GPD1</i>    | NM_005276    | Glycerol-3-phosphate dehydrogenase 1 (soluble)                          | 1.65 | 0.0418 |

|            |               |           |                                                                           |      |        |
|------------|---------------|-----------|---------------------------------------------------------------------------|------|--------|
| metabolism | <i>GPD2</i>   | NM_000408 | Glycerol-3-phosphate dehydrogenase 2 (mitochondrial)                      | 1.17 | 0.1327 |
|            | <i>LIPE</i>   | NM_005357 | Lipase, hormone-sensitive                                                 | 2.61 | 0.0719 |
|            | <i>LPL</i>    | NM_000237 | Lipoprotein lipase                                                        | N/A  | N/A    |
| Others     | <i>ALDH2</i>  | NM_000690 | Aldehyde dehydrogenase 2 family (mitochondrial)                           | 1.29 | 0.3847 |
|            | <i>DECRI</i>  | NM_001359 | 2,4-dienoyl CoA reductase 1, mitochondrial                                | 0.71 | 0.0231 |
|            | <i>DECRI2</i> | NM_020664 | 2,4-dienoyl CoA reductase 2, peroxisomal                                  | 1.03 | 0.9130 |
|            | <i>ECHS1</i>  | NM_004092 | Enoyl CoA hydratase, short chain, 1, mitochondrial                        | 1.14 | 0.2265 |
|            | <i>ECI2</i>   | NM_006117 | Enoyl-CoA delta isomerase 2                                               | 0.82 | 0.0781 |
|            | <i>HADHA</i>  | NM_000182 | Hydroxyacyl-CoA dehydrogenase/3-ketoacyl-CoA thiolase/enoyl-CoA hydratase | 1.31 | 0.0945 |
|            | <i>MCEE</i>   | NM_032601 | Methylmalonyl CoA epimerase                                               | 1.60 | 0.0005 |
|            | <i>MUT</i>    | NM_000255 | Methylmalonyl CoA mutase                                                  | 1.37 | 0.0949 |
|            | <i>PECR</i>   | NM_018441 | Peroxisomal trans-2-enoyl-CoA reductase                                   | 1.61 | 0.0150 |
|            | <i>PPAI</i>   | NM_021129 | Pyrophosphatase (inorganic) 1                                             | 1.04 | 0.6164 |

| Sub Pathway | Symbol        | GenBank   | Description                                                         | TβT-Hep3B<br>Hep3B | p-value |
|-------------|---------------|-----------|---------------------------------------------------------------------|--------------------|---------|
| Glycolysis  | <i>ALDOA</i>  | NM_000034 | Aldolase A, fructose-bisphosphate                                   | 1.54               | 0.3746  |
|             | <i>ALDOB</i>  | NM_000035 | Aldolase B, fructose-bisphosphate                                   | N/A                | N/A     |
|             | <i>ALDOC</i>  | NM_005165 | Aldolase C, fructose-bisphosphate                                   | 1.49               | 0.0262  |
|             | <i>BPGM</i>   | NM_001724 | 2,3-bisphosphoglycerate mutase                                      | 1.59               | 0.0643  |
|             | <i>ENO1</i>   | NM_001428 | Enolase 1, (alpha)                                                  | 0.93               | 0.7141  |
|             | <i>ENO2</i>   | NM_001975 | Enolase 2 (gamma, neuronal)                                         | 0.50               | 0.1153  |
|             | <i>ENO3</i>   | NM_001976 | Enolase 3 (beta, muscle)                                            | 0.69               | 0.2976  |
|             | <i>GALM</i>   | NM_138801 | Galactose mutarotase (aldose 1-epimerase)                           | 0.84               | 0.4465  |
|             | <i>GCK</i>    | NM_000162 | Glucokinase (hexokinase 4)                                          | N/A                | N/A     |
|             | <i>GPI</i>    | NM_000175 | Glucose-6-phosphate isomerase                                       | 1.55               | 0.3617  |
|             | <i>HK2</i>    | NM_000189 | Hexokinase 2                                                        | 1.81               | 0.6340  |
|             | <i>HK3</i>    | NM_002115 | Hexokinase 3 (white cell)                                           | N/A                | N/A     |
|             | <i>LDHA</i>   | NM_005566 | Lactate dehydrogenase A                                             | 1.22               | 0.2212  |
|             | <i>LDHB</i>   | NM_002300 | Lactate dehydrogenase B                                             | N/A                | N/A     |
|             | <i>PFKL</i>   | NM_002626 | Phosphofructokinase, liver                                          | 1.06               | 0.8032  |
|             | <i>PGAM2</i>  | NM_000290 | Phosphoglycerate mutase 2 (muscle)                                  | 0.28               | 0.0007  |
|             | <i>PGK1</i>   | NM_000291 | Phosphoglycerate kinase 1                                           | 0.76               | 0.3228  |
|             | <i>PGK2</i>   | NM_138733 | Phosphoglycerate kinase 2                                           | 0.85               | 0.6522  |
|             | <i>PGM1</i>   | NM_002633 | Phosphoglucomutase 1                                                | 2.04               | 0.1234  |
|             | <i>PGM2</i>   | NM_018290 | Phosphoglucomutase 2                                                | 0.95               | 0.7028  |
|             | <i>PGM3</i>   | NM_015599 | Phosphoglucomutase 3                                                | 0.93               | 0.7493  |
|             | <i>PKLR</i>   | NM_000298 | Pyruvate kinase, liver and RBC                                      | 7.07               | 0.0604  |
|             | <i>PKM2</i>   | NM_002654 | Pyruvate kinase, muscle 2                                           | 0.78               | 0.4184  |
|             | <i>TPH1</i>   | NM_000365 | Triosephosphate isomerase 1                                         | 0.75               | 0.4871  |
|             | <i>SLC2A1</i> | NM_006516 | Solute carrier family 2 (facilitated glucose transporter), member 1 | 1.14               | 0.1090  |
|             | <i>SLC2A2</i> | NM_000340 | Solute carrier family 2 (facilitated glucose transporter), member 2 | 0.67               | 0.0541  |
|             | <i>SLC2A3</i> | NM_006931 | Solute carrier family 2 (facilitated glucose transporter), member 3 | 0.77               | 0.2152  |
|             | <i>SLC2A4</i> | NM_001042 | Solute carrier family 2 (facilitated glucose transporter), member 4 | 2.18               | 0.1921  |
|             | <i>PDK1</i>   | NM_002610 | Pyruvate dehydrogenase kinase, isozyme 1                            | 0.68               | 0.2717  |
|             | <i>PDK2</i>   | NM_002611 | Pyruvate dehydrogenase kinase, isozyme 2                            | 1.64               | 0.1585  |

|                                   |               |              |                                                                                  |      |        |
|-----------------------------------|---------------|--------------|----------------------------------------------------------------------------------|------|--------|
| Pyruvate dehydrogenase regulation | <i>PDK3</i>   | NM_005391    | Pyruvate dehydrogenase kinase, isozyme 3                                         | 1.02 | 0.9694 |
|                                   | <i>PDK4</i>   | NM_002612    | Pyruvate dehydrogenase kinase, isozyme 4                                         | 3.57 | 0.0436 |
|                                   | <i>PDP2</i>   | NM_020786    | Pyruvate dehydrogenase phosphatase catalytic subunit 2                           | 1.34 | 0.5304 |
|                                   | <i>PDPR</i>   | NM_017990    | Pyruvate dehydrogenase phosphatase regulatory subunit                            | 1.09 | 0.6094 |
| Pyruvate dehydrogenase complex    | <i>DLAT</i>   | NM_001931    | Dihydrolipoamide S-acetyltransferase                                             | 0.94 | 0.8611 |
|                                   | <i>DLD</i>    | NM_000108    | Dihydrolipoamide dehydrogenase                                                   | 1.52 | 0.1825 |
|                                   | <i>DLST</i>   | NM_001933    | Dihydrolipoamide S-succinyltransferase                                           | 1.43 | 0.1666 |
|                                   | <i>PDHA1</i>  | NM_000284    | Pyruvate dehydrogenase (lipoamide) alpha 1                                       | 1.21 | 0.1399 |
|                                   | <i>PDHB</i>   | NM_000925    | Pyruvate dehydrogenase (lipoamide) beta                                          | 1.33 | 0.0121 |
| TCA cycle                         | <i>ACLY</i>   | NM_001096    | ATP citrate lyase                                                                | 1.36 | 0.0456 |
|                                   | <i>ACO1</i>   | NM_002197    | Aconitase 1, soluble                                                             | 1.61 | 0.0019 |
|                                   | <i>ACO2</i>   | NM_001098    | Aconitase 2, mitochondrial                                                       | 2.16 | 0.2250 |
|                                   | <i>CS</i>     | NM_004077    | Citrate synthase                                                                 | 1.14 | 0.6518 |
|                                   | <i>FH</i>     | NM_000143    | Fumarate hydratase                                                               | 0.98 | 0.8067 |
|                                   | <i>IDH1</i>   | NM_005896    | Isocitrate dehydrogenase 1 (NADP+), soluble                                      | 1.28 | 0.1670 |
|                                   | <i>IDH2</i>   | NM_002168    | Isocitrate dehydrogenase 2 (NADP+), mitochondrial                                | 1.00 | 0.9803 |
|                                   | <i>IDH3A</i>  | NM_005530    | Isocitrate dehydrogenase 3 (NAD+) alpha                                          | 1.44 | 0.1534 |
|                                   | <i>IDH3B</i>  | NM_174856    | Isocitrate dehydrogenase 3 (NAD+) beta                                           | 1.36 | 0.1599 |
|                                   | <i>IDH3G</i>  | NM_174869    | Isocitrate dehydrogenase 3 (NAD+) gamma                                          | 1.16 | 0.2548 |
|                                   | <i>MDH1</i>   | NM_005917    | Malate dehydrogenase 1, NAD (soluble)                                            | 1.05 | 0.4306 |
|                                   | <i>MDH1B</i>  | NM_001039845 | Malate dehydrogenase 1B, NAD (soluble)                                           | 1.66 | 0.3292 |
|                                   | <i>MDH2</i>   | NM_005918    | Malate dehydrogenase 2, NAD (mitochondrial)                                      | 1.36 | 0.3681 |
|                                   | <i>OGDH</i>   | NM_002541    | Oxoglutarate dehydrogenase                                                       | 1.54 | 0.1297 |
|                                   | <i>PC</i>     | NM_000920    | Pyruvate carboxylase                                                             | 1.17 | 0.2044 |
|                                   | <i>PCK1</i>   | NM_002591    | Phosphoenolpyruvate carboxykinase 1 (soluble)                                    | 1.47 | 0.4258 |
|                                   | <i>PCK2</i>   | NM_004563    | Phosphoenolpyruvate carboxykinase 2                                              | 0.99 | 0.9723 |
|                                   | <i>SDHA</i>   | NM_004168    | Succinate dehydrogenase complex, subunit A, flavoprotein (Fp)                    | 1.21 | 0.4673 |
|                                   | <i>SDHB</i>   | NM_003000    | Succinate dehydrogenase complex, subunit B, iron sulfur (Ip)                     | 1.17 | 0.2019 |
|                                   | <i>SDHC</i>   | NM_003001    | Succinate dehydrogenase complex, subunit C, integral membrane protein            | 1.92 | 0.0836 |
|                                   | <i>SDHD</i>   | NM_003001    | Succinate dehydrogenase complex, subunit D, integral membrane protein            | 1.21 | 0.4810 |
|                                   | <i>SUCLA2</i> | NM_003850    | Succinate-CoA ligase, ADP-forming, beta subunit                                  | 1.22 | 0.3138 |
|                                   | <i>SUCLG1</i> | NM_003849    | Succinate-CoA ligase, alpha subunit                                              | 0.84 | 0.5854 |
|                                   | <i>SUCLG2</i> | NM_003848    | Succinate-CoA ligase, GDP-forming, beta subunit                                  | 1.23 | 0.5511 |
| Glutamine Metabolism              | <i>GLS1</i>   | NM_014905    | Glutaminase 1                                                                    | 1.21 | 0.0995 |
|                                   | <i>GLS2</i>   | NM_013267    | Glutaminase 2                                                                    | N/A  | N/A    |
|                                   | <i>SLC1A5</i> | NM_005628    | Solute carrier family 1 (neutral amino acid transporter), member 5               | 0.97 | 0.9588 |
|                                   | <i>SLC7A5</i> | NM_003486    | Solute carrier family 7 (amino acid transporter light chain, L system), member 5 | 0.64 | 0.0680 |

List of analyzed genes. Expression in fold comparing TβT-Hep3B to Hep3B. p<0.05 was considered significant. Values <1 indicate lower expression (green shading when significant) and values >1 indicate higher expression (red shading when significant) as compared to Hep3B. N/A indicates Ct values >35 and was considered as non-detectable expression.
